# Supplementary material for: Impact of COVID-19 on Timing of Hip-Fracture Surgeries: An Interrupted Time-Series Analysis of the Pre/Post-Quarantine Period in Northern Italy
Source: PubMed Central journal article supplement (PMC9808284; doi:10.34172/ijhpm.2021.103), 2021-09-01
Supplement: ijhpm-11-2083-s001.pdf [file ijhpm-11-2083-s001.pdf]

**Article title:** Impact of COVID-19 on Timing of Hip-Fracture Surgeries: An Interrupted Time-Series Analysis of the Pre/Post-Quarantine Period in Northern Italy

**Journal name:** International Journal of Health Policy and Management (IJHPM)

**Authors' information:** Jacopo Lenzi<sup>1</sup>, Stefano Rousset<sup>2\*</sup>, Maria Pia Fantini<sup>1</sup>, Maria Michela Gianino<sup>2</sup>

<sup>1</sup>Department of Biomedical and Neuromotor Sciences, Alma Mater Studiorum – Università di Bologna, Bologna, Italy.

<sup>2</sup>Department of Public Health Sciences and Paediatrics, Università di Torino, Torino, Italy.

(\*Corresponding author: [stefano.rousset@unito.it](mailto:stefano.rousset@unito.it))

**Supplementary file 1**

**Table S1.** Patient- and hospital-level characteristics of the control and study groups, by 16-week period. Values are counts (percentages).

| Characteristic            | All         | Control cohort (2018/19) |                  | Study cohort (2019/20) |                   | P-value |
|---------------------------|-------------|--------------------------|------------------|------------------------|-------------------|---------|
|                           |             | Nov-20 to Mar-11         | Mar-12 to Jul-01 | Nov-20 to Mar-10       | Mar-11 to June-30 |         |
| Sex                       |             |                          |                  |                        |                   | 0.716   |
| Male                      | 2051 (25.1) | 572 (25.5)               | 531 (25.7)       | 524 (24.4)             | 424 (24.6)        |         |
| Female                    | 6135 (74.9) | 1671 (74.5)              | 1539 (74.3)      | 1627 (75.6)            | 1298 (75.4)       |         |
| Age group, y              |             |                          |                  |                        |                   | 0.962   |
| <80                       | 2102 (25.7) | 576 (25.7)               | 540 (26.1)       | 541 (25.2)             | 445 (25.8)        |         |
| 80–84                     | 1956 (23.9) | 541 (24.1)               | 486 (23.5)       | 509 (23.7)             | 420 (24.4)        |         |
| 85–89                     | 2294 (28.0) | 634 (28.3)               | 563 (27.2)       | 611 (28.4)             | 486 (28.2)        |         |
| ≥90                       | 1834 (22.4) | 492 (21.9)               | 481 (23.2)       | 490 (22.8)             | 371 (21.5)        |         |
| Charlson index score      |             |                          |                  |                        |                   | 0.852   |
| 0                         | 6963 (85.1) | 1903 (84.8)              | 1751 (84.6)      | 1841 (85.6)            | 1468 (85.2)       |         |
| 1                         | 890 (10.9)  | 242 (10.8)               | 228 (11.0)       | 233 (10.8)             | 187 (10.9)        |         |
| ≥2                        | 333 (4.1)   | 98 (4.4)                 | 91 (4.4)         | 77 (3.6)               | 67 (3.9)          |         |
| Hospital status/ownership |             |                          |                  |                        |                   | <0.001  |
| LHA                       | 5936 (72.5) | 1651 (73.6)              | 1496 (72.3)      | 1603 (74.5)            | 1186 (68.9)       |         |
| Research/teaching         | 2054 (25.1) | 532 (23.7)               | 506 (24.4)       | 502 (23.3)             | 514 (29.8)        |         |
| Private                   | 196 (2.4)   | 60 (2.7)                 | 68 (3.3)         | 46 (2.1)               | 22 (1.3)          |         |
| Hospital location         |             |                          |                  |                        |                   | <0.001  |
| Cities                    | 3440 (42.0) | 911 (40.6)               | 844 (40.8)       | 870 (40.4)             | 815 (47.3)        |         |
| Towns/suburbs             | 4745 (58.0) | 1331 (59.3)              | 1226 (59.2)      | 1281 (59.6)            | 907 (52.7)        |         |
| Rural areas               | 1 (0.0)     | 1 (0.0)                  | 0 (0.0)          | 0 (0.0)                | 0 (0.0)           |         |
| Hospital volume, HFs/y    |             |                          |                  |                        |                   | <0.001  |
| <50                       | 38 (0.5)    | 22 (1.0)                 | 3 (0.1)          | 7 (0.3)                | 6 (0.3)           |         |
| 50–149                    | 1106 (13.5) | 309 (13.8)               | 295 (14.3)       | 296 (13.8)             | 206 (12.0)        |         |
| 150–249                   | 3887 (47.5) | 1058 (47.2)              | 1026 (49.6)      | 1062 (49.4)            | 741 (43.0)        |         |
| ≥250                      | 3155 (38.5) | 854 (38.1)               | 746 (36.0)       | 786 (36.5)             | 769 (44.7)        |         |

*Note:* P-values were obtained with the chi-squared test.

*Abbreviations:* LHA, local healthcare authority; HF, hip fracture.

**Figure S1.** Sex-, age- and comorbidity-standardized percentages of hip-fracture surgery initiated within two days, within one day and on the same day as hospital admission in Piedmont in the 16 weeks before and after Italy’s COVID-19 national quarantine. Secondary diagnoses of upper femur fracture are excluded ( $n = 198$ ).

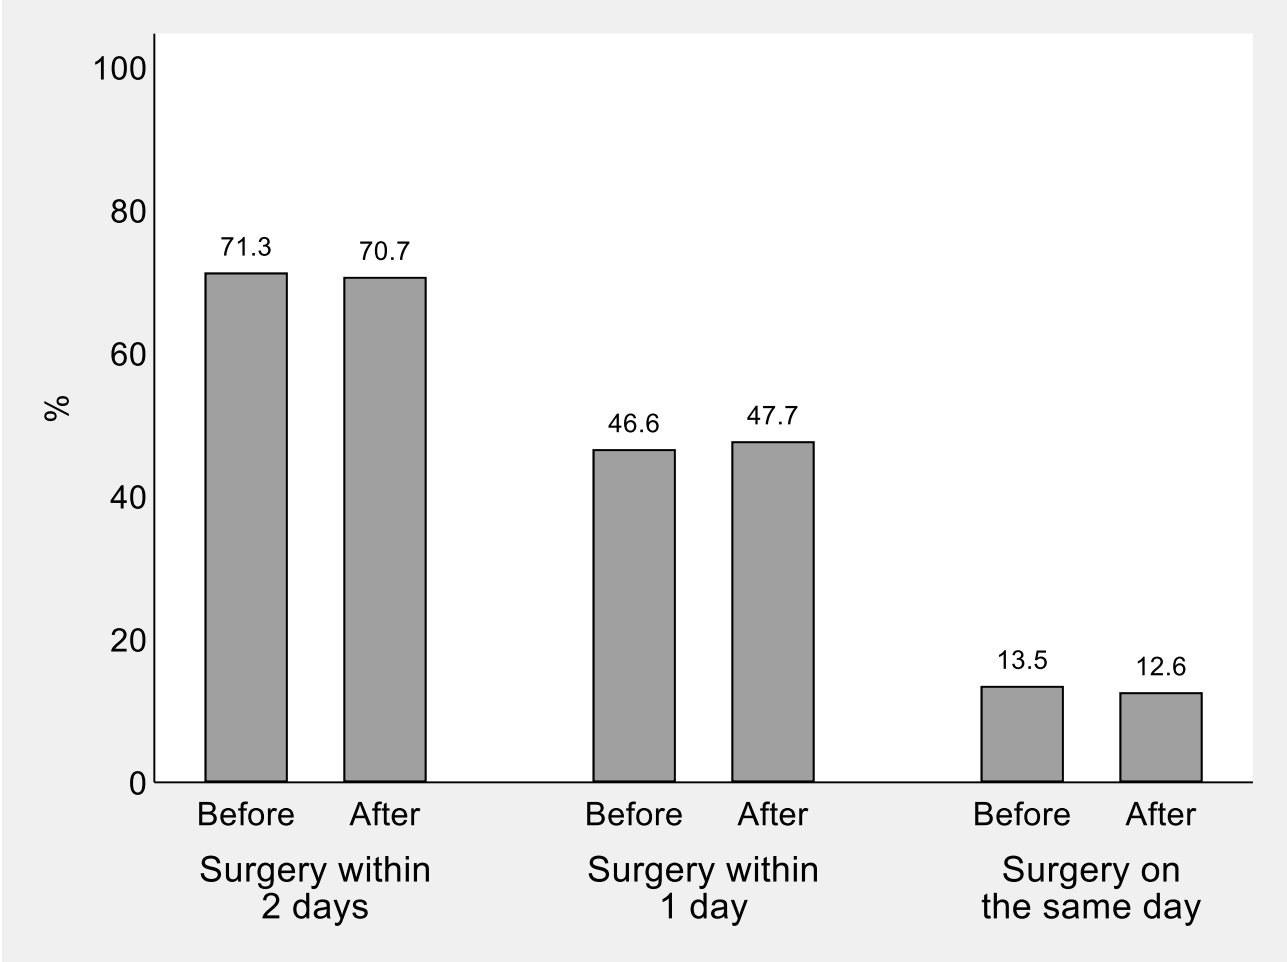

*Note:* No significant differences were found between the pre- and post-quarantine period on multivariable logistic regression analysis (two days:  $P$ -value = 0.707; one day:  $P$ -value = 0.586; same day:  $P$ -value = 0.463).

**Figure S2.** Interrupted time-series analysis of weekly sex-, age- and comorbidity-standardized percentages of hip-fracture surgery in Piedmont in the 16 weeks before and after Italy’s COVID-19 national quarantine (dashed vertical line); data observed the year before (2018/19) are used for comparison. Secondary diagnoses of upper femur fracture are excluded ( $n = 198$ ).

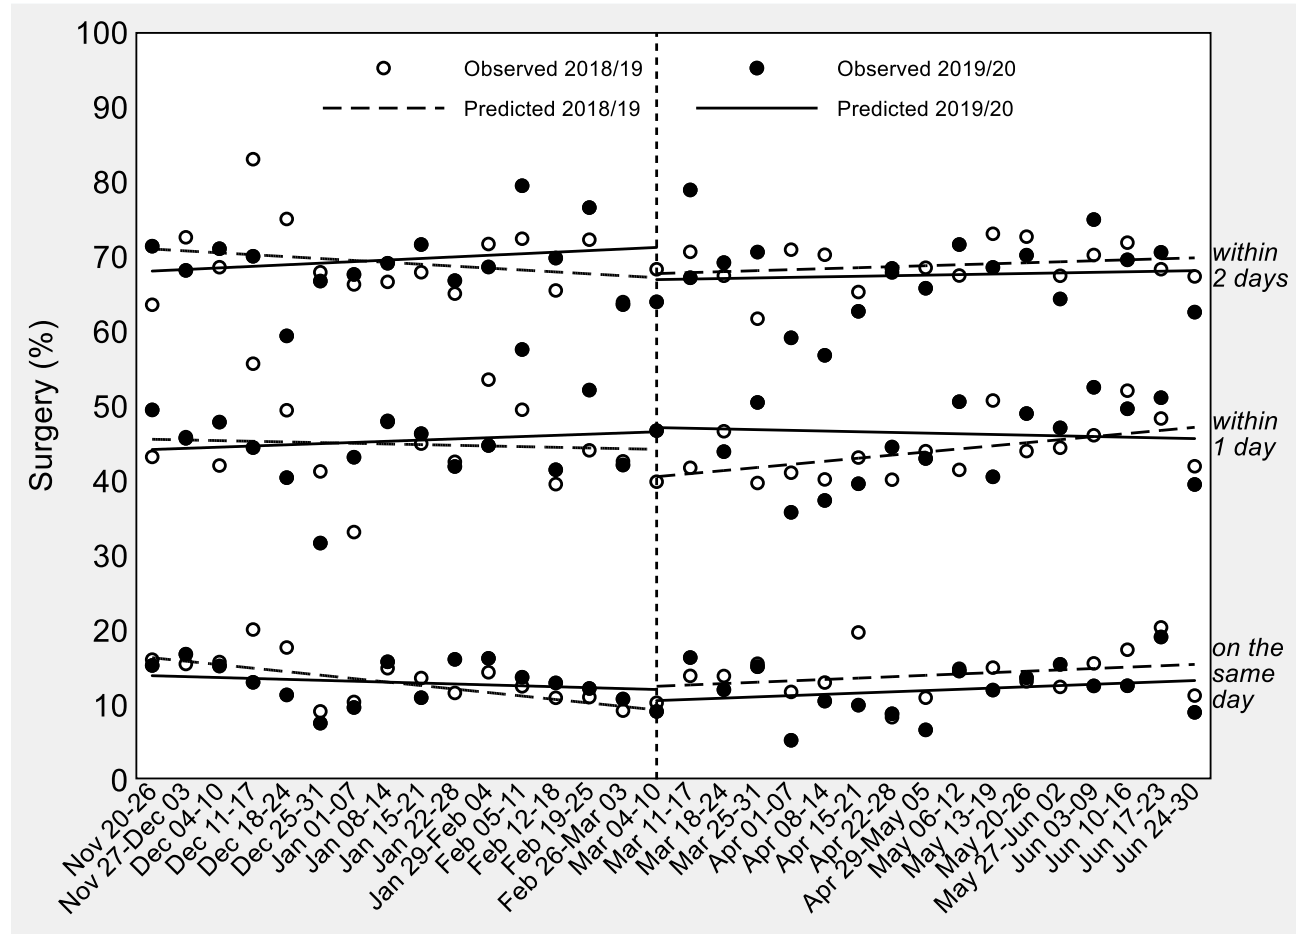

*Note:* The last day of the control period is July 1, because 2019 is a common (non-leap) year.
